# Supplementary material
Source: PubMed Central journal article supplement (PMC6685688)
Supplement: NIHMS1023596-supplement-Suppl_Mat.pdf [file NIHMS1023596-supplement-Suppl_Mat.pdf]

Supporting information for:

Dichlorophenyl piperazines, including a recently-  
approved atypical antipsychotic, are potent inhibitors  
of DHCR7, the last enzyme in cholesterol  
biosynthesis

<sup>a</sup>Thiago C. Genaro-Mattos, <sup>a</sup>Keri A. Tallman, <sup>c</sup>Luke B. Allen, <sup>d</sup>Allison Anderson, <sup>d</sup>Karoly  
Mirnics, <sup>c</sup>Zeljka Korade and <sup>a,b</sup>Ned A. Porter\*

1. **Supporting Figure 1:** Effect of different concentrations of cariprazine and AY9944 on human fibroblasts <sup>13</sup>C-sterols.....*Page S2*
2. **Supporting Figure 2:** <sup>13</sup>C-sterols and Residual Cholesterol Synthesis in A549 cells lines in the presence and absence of the antipsychotics.....*Page S3*
3. **Supporting Figure 3:** Cariprazine affects serum sterol levels of mice injected with the drug .....*Page S4*
4. **RNA extraction and qPCR analysis**.....*Page S5*
5. **Purity of tested compounds**.....*Page S6*

### Supporting Figure 1

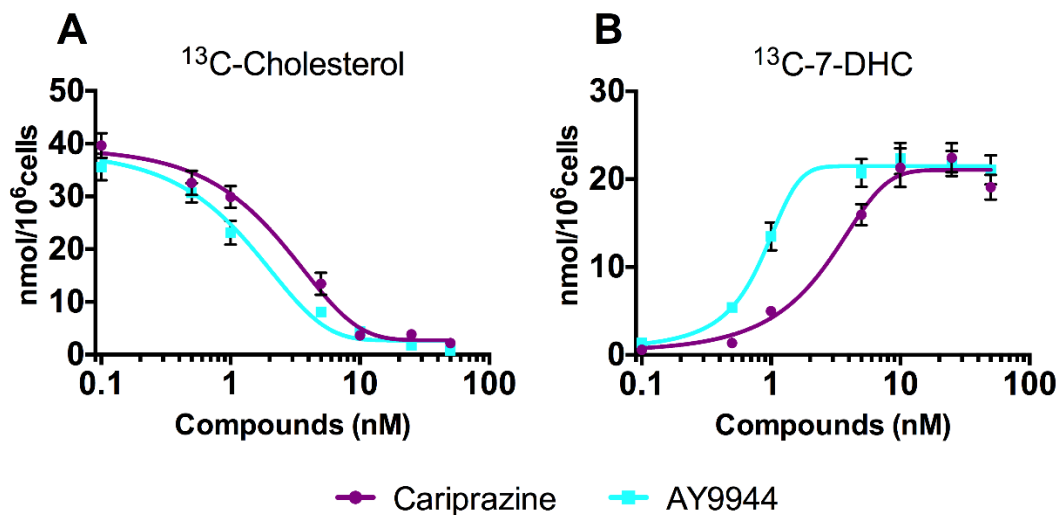

**Supporting Figure 1.** Effect of different concentrations of cariprazine and AY9944 on human fibroblasts <sup>13</sup>C-sterols. Three different control human fibroblasts were cultured in the presence of cariprazine and AY9944 for 7 days in lipid-deficient medium containing 10 mM <sup>13</sup>C-glucose as major energy source.

## Supporting Figure 2

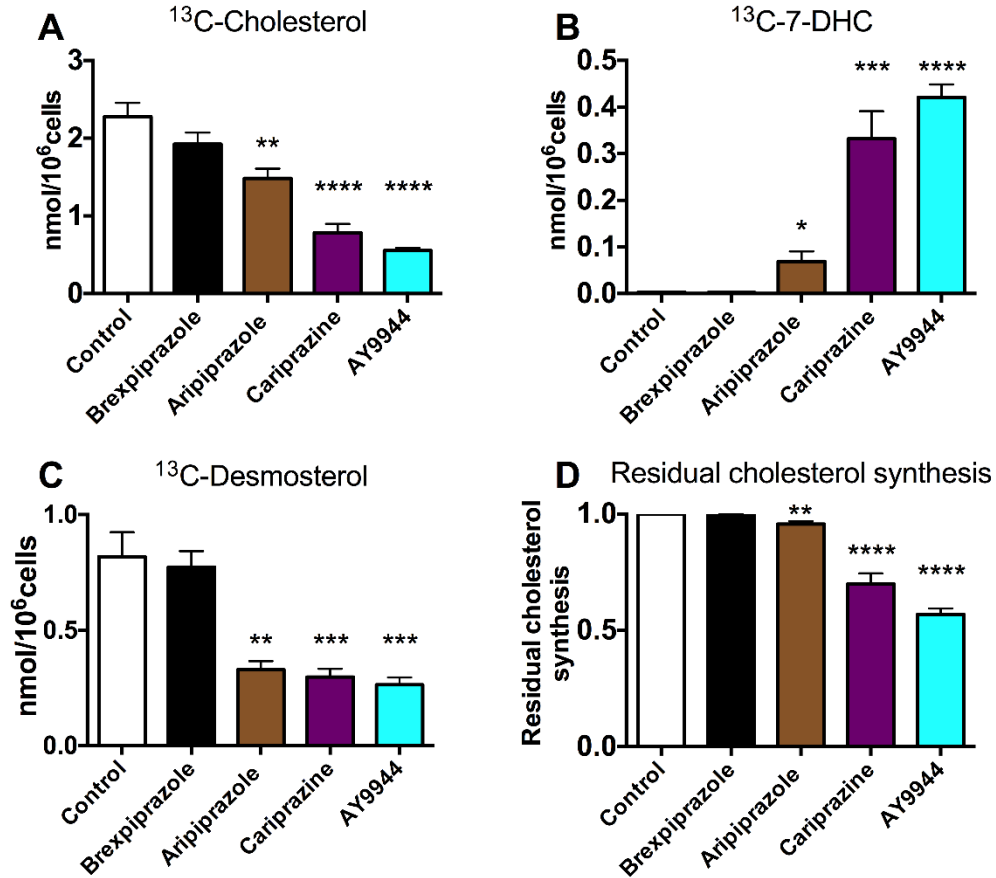

**Supporting Figure 2.**  $^{13}\text{C}$ -sterols and Residual Cholesterol Synthesis in A549 cells lines in the presence and absence of the antipsychotics. Cells were incubated with 10 mM  $^{13}\text{C}$ -glucose in lipid-deficient medium for 48 h. All four compounds were present at 100 nM. \*p<0.05, \*\*p<0.01, \*\*\*p<0.005 and \*\*\*\*p<0.001.

### Supporting Figure 3

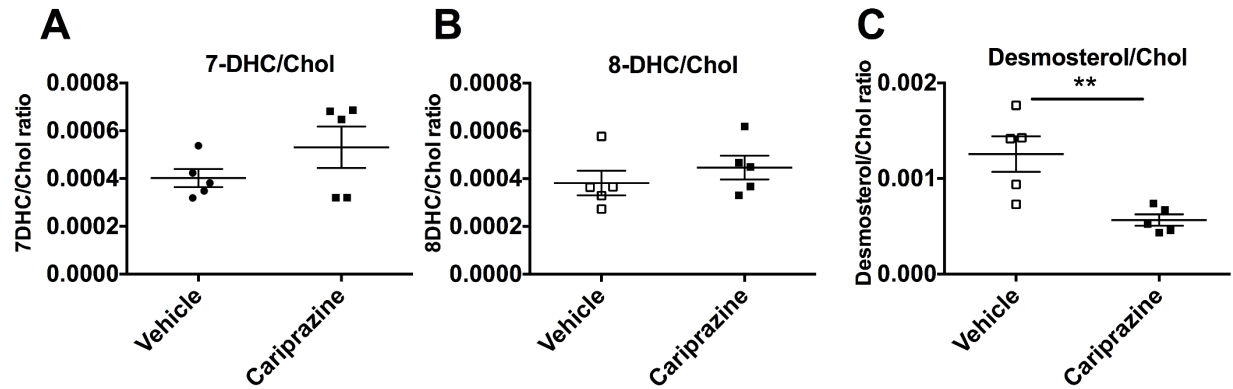

**Supporting Figure 3.** Cariprazine affects serum sterol levels of mice injected with the drug. Cholesterol levels correspond to:  $556.5 \pm 13.1$  nmol/million cells (vehicle) and  $672.8 \pm 26.1$  nmol/million cells (cariprazine).

## RNA Preparation and Quantitative PCR

These methods have been described previously (1, 2) and we provide here detailed description. Total RNA was isolated from the cells using Trizol (Life Technologies, Rockville, MD). The concentration of total RNA was measured on a Nanodrop instrument (Thermo Scientific, Wilmington, DE). Total RNA (500 ng) from each sample was reverse transcribed to cDNA using a High Capacity cDNA Archive Kit (Applied Biosystems, Foster City, CA). Real time PCR was performed with an StepOnePlus Real Time PCR System (ThermoFisher) using cDNA (equivalent to 5 ng of input RNA) per 25  $\mu$ l reaction volume, 2X SYBR green master mix, and gene-specific primers. All samples were run in triplicate. Differential expression was calculated as  $\Delta\Delta C_t$  against expression of two normalizers (*Actb*, *Pgk1*).

Statistical analyses of the qPCR data were performed using pairwise Student t-test in MS-Excel 2010, while false discovery for multiple testing was performed by calculating the individual q-value (3) for transcript using the Benjamini-Hochberg approach (4).

## References for the RNA Preparation and Quantitative PCR

1. Korade Z, Xu L, Shelton R, Porter NA. Biological activities of 7-dehydrocholesterol-derived oxysterols: implications for Smith-Lemli-Opitz syndrome. *J Lipid Res.* 2010; 51:3259–3269. [PubMed: 20702862]
2. Korade Z, Kenworthy AK, Mirnics K. Molecular consequences of altered neuronal cholesterol biosynthesis. *J Neurosci Res.* 2009; 87:866–875. [PubMed: 18951487]
3. Storey JD. A direct approach to false discovery rates. *Journal of Royal Statistical Society B.* 2002; 64:479–498.
4. Benjamini Y, Hochberg Y. Controlling the false discovery rate: a practical and powerful approach to multiple testing. *Journal of the Royal Statistical Society Series B (Methodological).* 1995; 57:289–300.

## mRNA levels of *hmgcr* and *dhcr7* in the cortex.

$\Delta\Delta C_t$  values correspond to the difference between cariprazine group and vehicles groups. Values correspond to the mean  $\pm$  SE of five animals.  $\Delta\Delta C_t$  for *hmgcr* was  $0.048 \pm 0.077$  and for *dhcr7* was  $0.063 \pm 0.108$ . There is no statistical difference between cariprazine and vehicle groups.

**Purity of tested compounds**

All tested compounds have purity >95% as determined by NMR and/or HPLC analysis. The Certificate of Analysis or analytical evidence is included for each compound.

## Cariprazine (ChemScene, 99.76%)

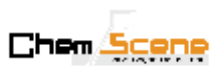

Bioactive Molecules, Building Blocks, Intermediates

www.ChemScene.com

### Certificate of Analysis

Product Name: Cariprazine  
Cat. No.: CS-1569  
CAS No.: 839712-12-8  
Batch No.: 16216  
Chemical Name: Urea, N'-[trans-4-[2-[4-(2,3-dichlorophenyl)-1-piperazinyl]ethyl]cyclohexyl]-N,N-dimethyl-

#### PHYSICAL AND CHEMICAL PROPERTIES

Molecular Formula:  $C_{28}H_{42}Cl_2N_6O$   
Molecular Weight: 427.41  
Storage: Powder      -20°C    3 years  
                                      4°C        2 years  
                                      In solvent   -80°C    6 months  
                                                                 -20°C    1 month

Chemical Structure:

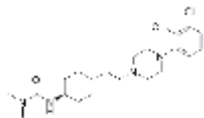

#### ANALYTICAL DATA

Appearance: Light brown to brown (Solid)  
 $^1H$  NMR Spectrum: Consistent with structure  
LCMS: Consistent with structure  
Purity (LCMS): 99.76%  
Conclusion: The product has been tested and complies with the given specifications.

Caution: Product has not been fully validated for medical applications. For research use only.

Tel: 732-484-9848 Fax: 888-484-5008 E-mail: sales@ChemScene.com  
Address: 1 Deer Park Dr, Suite Q, Monmouth Junction, NJ 08852, USA

Sample ID: YFB2708-001-1, Catalog No: CS-1569 Batch#16216, CDCl3

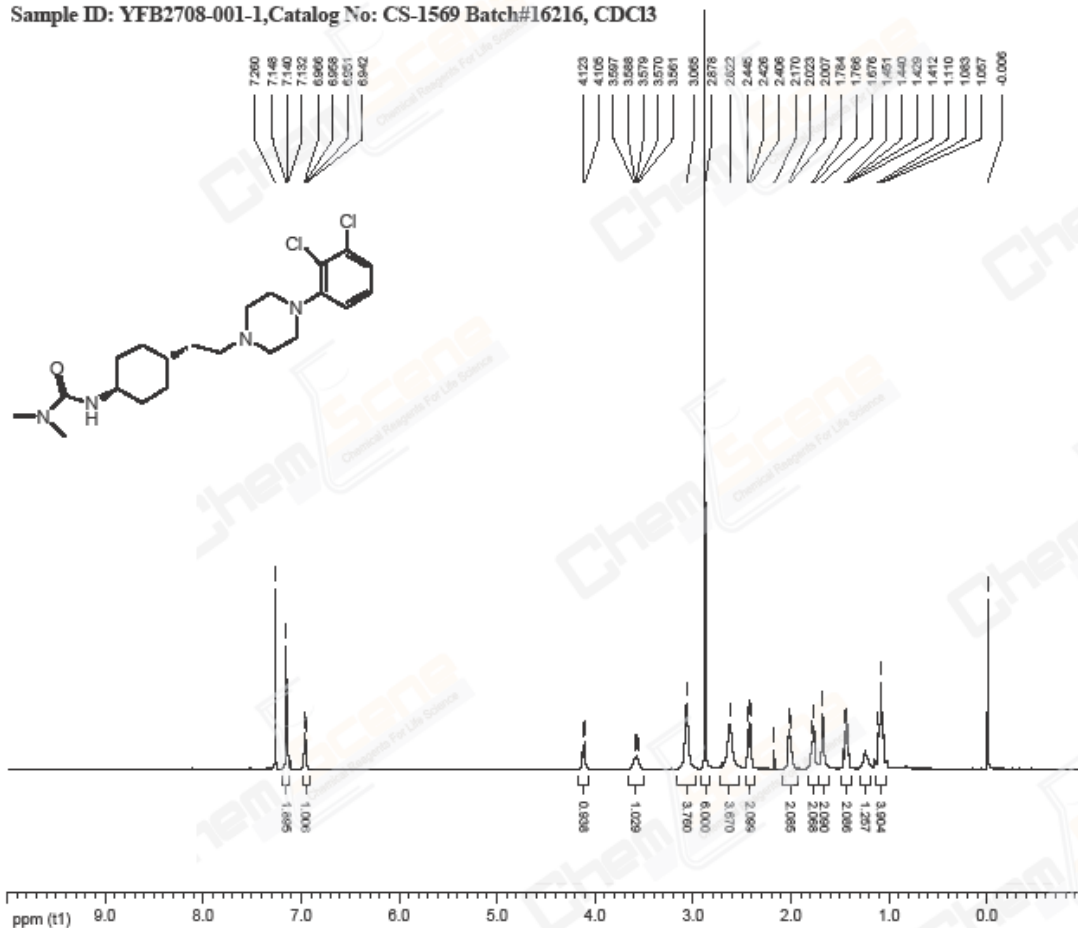

Date: 25 May 2015  
Document's Title: Catalog No: CS-1569 Batch#16216  
Spectrum Title: yfb2708-001-1-odcl3-150525  
Frequency (MHz): (f1) 400.132  
Original Points Count: (f1) 24999  
Actual Points Count: (f1) 85538  
Acquisition Time (sec): (f1) 2.4999  
Spectral Width (ppm): (f1) 24.992  
Pulse Program: ZG30  
Temperature: 293.96  
Number of Scans: 12  
Acq. Date: Mon May 25 11:11:04 AM



Brexiprazole (ChemScene, 99.38%)

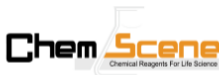

Bioactive Molecules, Building Blocks, Intermediates

www.ChemScene.com

## Certificate of Analysis

**Product Name:** Brexiprazole  
**Cat. No.:** CS-2108  
**CAS No.:** 913611-97-9  
**Batch No.:** 11421  
**Chemical Name:** 2(1H)-Quinolinone, 7-[4-(4-benzo[b]thien-4-yl-1-piperazinyl)butoxy]-

### PHYSICAL AND CHEMICAL PROPERTIES

**Molecular Formula:** C<sub>25</sub>H<sub>27</sub>N<sub>3</sub>O<sub>2</sub>S  
**Molecular Weight:** 433.57  
**Storage:**  
Powder      -20°C    3 years  
                  4°C        2 years  
In solvent   -80°C    6 months  
                  -20°C    1 month

**Chemical Structure:**

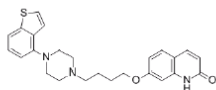

### ANALYTICAL DATA

**Appearance:** White to off-white (Solid)  
**<sup>1</sup>H NMR Spectrum:** Consistent with structure  
**LCMS:** Consistent with structure  
**Purity (LCMS):** 99.38%  
**Conclusion:** The product has been tested and complies with the given specifications.

**Caution: Product has not been fully validated for medical applications. For research use only.**

Tel: 732-484-9848 Fax: 888-484-5008 E-mail: sales@ChemScene.com  
Address: 1 Deer Park Dr, Suite Q, Monmouth Junction, NJ 08852, USA

Sample ID: CPK2016-N16-11421 ,Catalog No: CS-2108 Batch#11421 ,DMSO

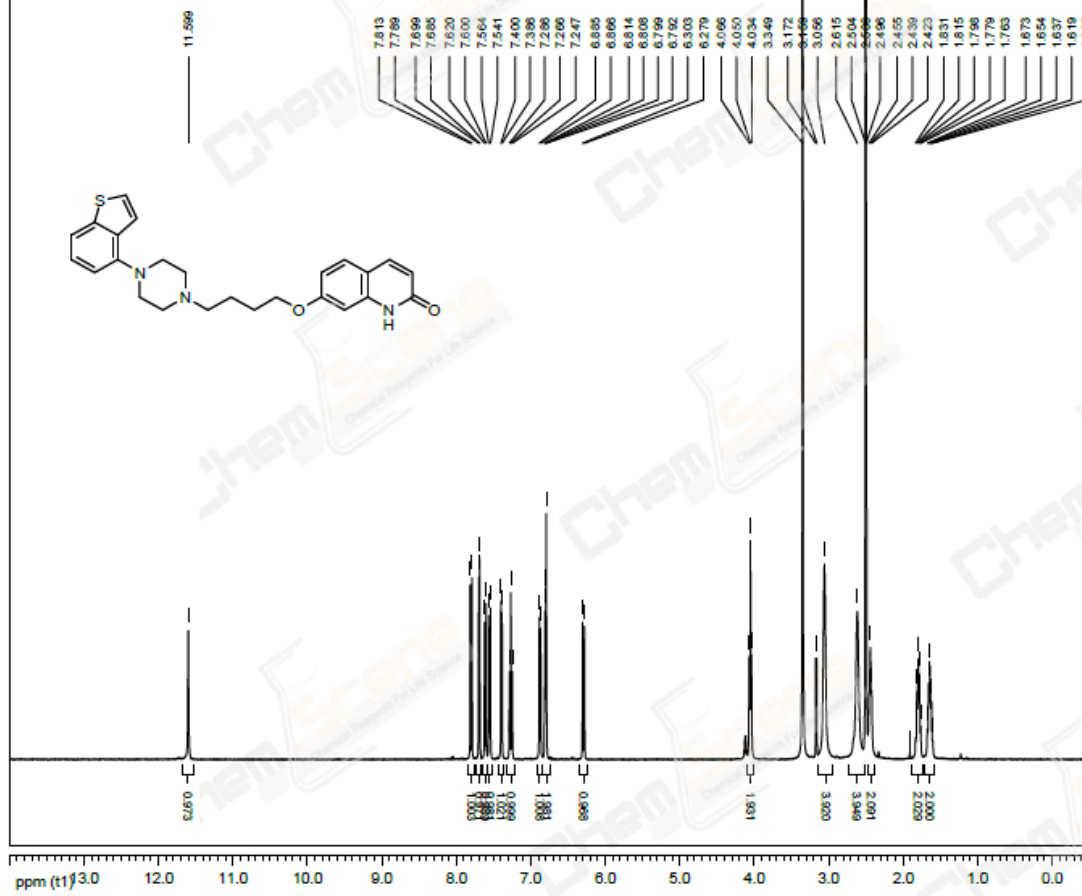

Date: 21 Nov 2016  
Document's Title: CPK2016-N16-11421  
Catalog No: CS-2108 Batch#11421

Spectrum Title: CPK2016-N16-11421  
Frequency (MHz): (f1) 400.130  
Original Points Count: (f1) 32768  
Actual Points Count: (f1) 32768  
Acquisition Time (sec): (f1) 3.2768  
Spectral Width (ppm): (f1) 24.992  
Pulse Program: Unknown

*Aripiprazole (Bristol Myers Squibb, >95%)*

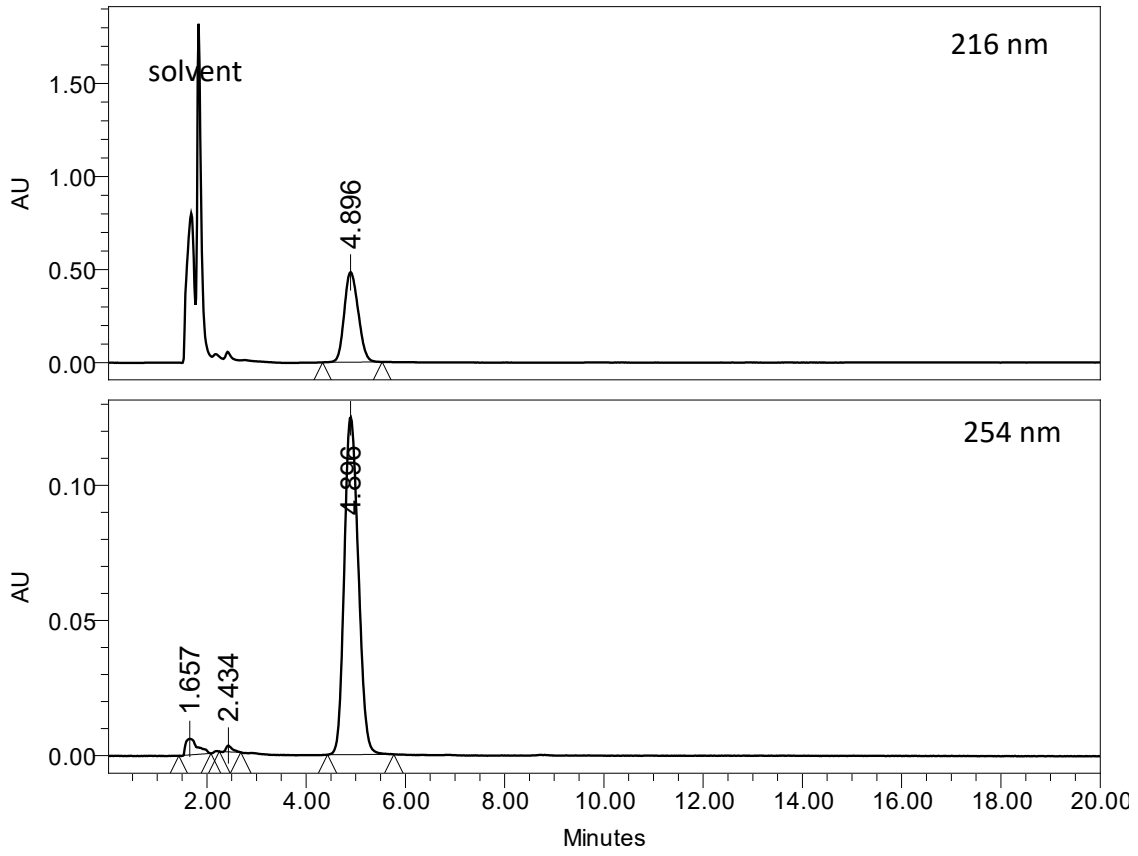

AY9944 (Vanderbilt Synthesis Core, >95%)

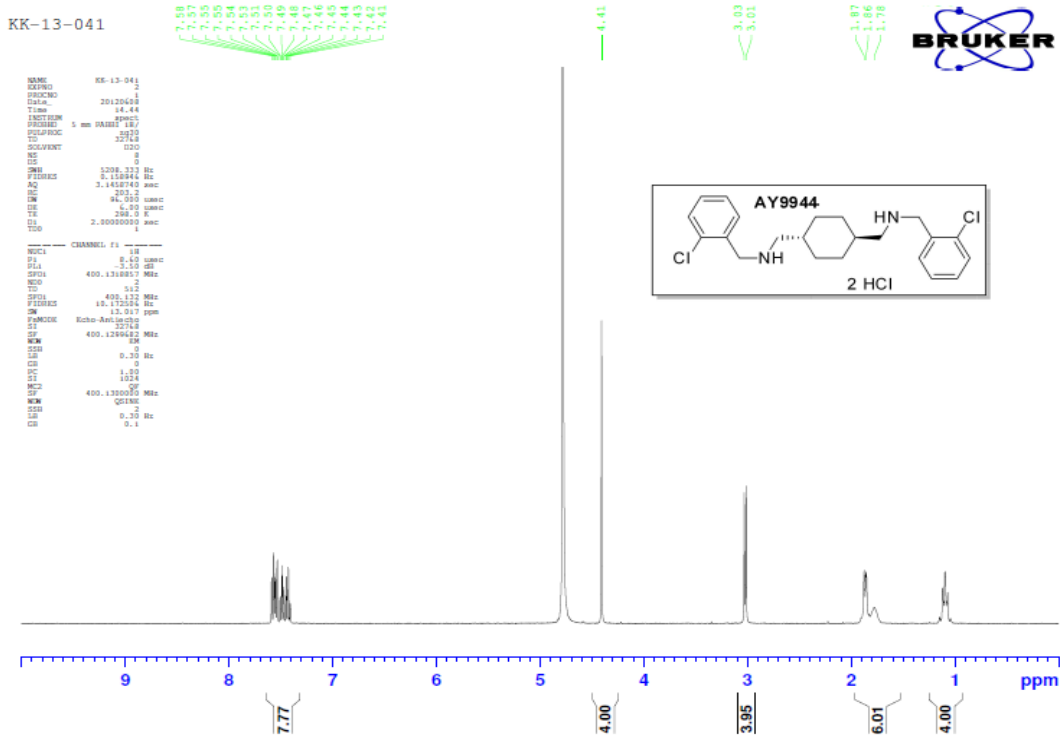

KK-13-041 9944 D2O

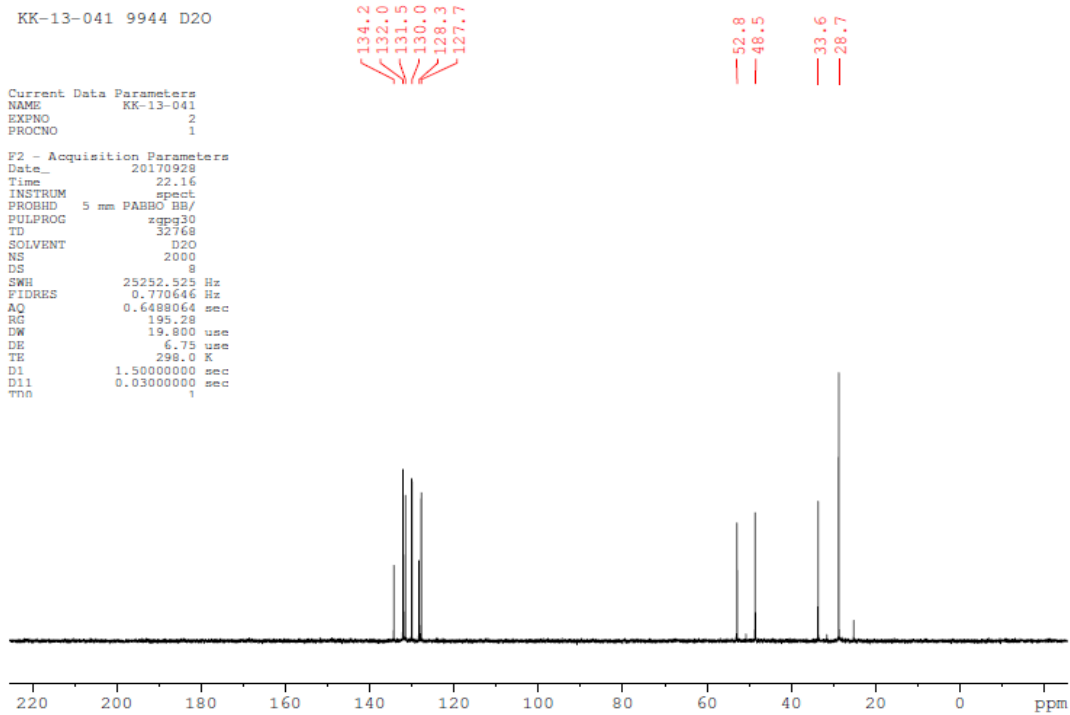

VCNDD 12410 Agilent 1200 LCMS

Sample Name: kk-13-043-pure  
User: kimk3

Acquired: 6/8/2012 11:47 AM  
Filename: C:\LCMS\DATA\KWANGHO\_KIM\06-12\KK-13-043-PURE11-12410 LCMS-23894.D

Method: KINETEX NEW1.M  
Location: 1,1:E,4

Description: Easy-Access Method:  
'Kinetex 1 Minute', 391.00, 141.00

| Peak # | Time  | Area % UV215 | Area % UV254 | Area % TIC(+) | BPM   | Area Abs UV215 | Area Abs UV254 | Area Abs TIC(+) |
|--------|-------|--------------|--------------|---------------|-------|----------------|----------------|-----------------|
| 1      | 0.074 | 53.8         | 0.0          | 11.2          | 157.2 | 1348.30        | 0              | 128110.30       |
| 1      | 0.074 | 53.8         | 0.0          | 11.2          | 157.2 | 1348.30        | 0              | 128110.30       |
| 2      | 0.521 | 46.2         | 100.0        | 88.8          | 391.2 | 1158.64        | 26.68          | 1010837.94      |
| 2      | 0.521 | 46.2         | 100.0        | 88.8          | 391.2 | 1158.64        | 26.68          | 1010837.94      |

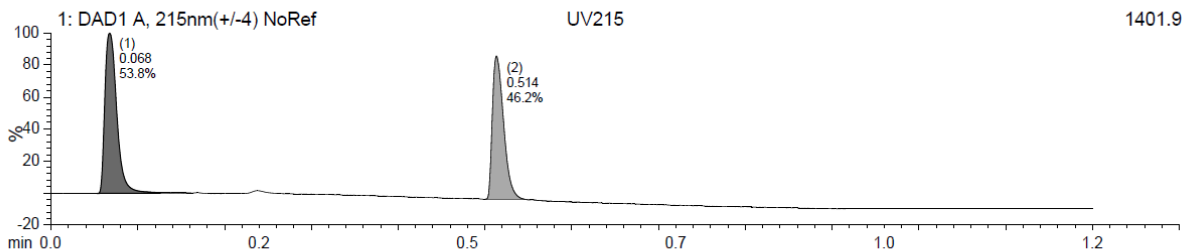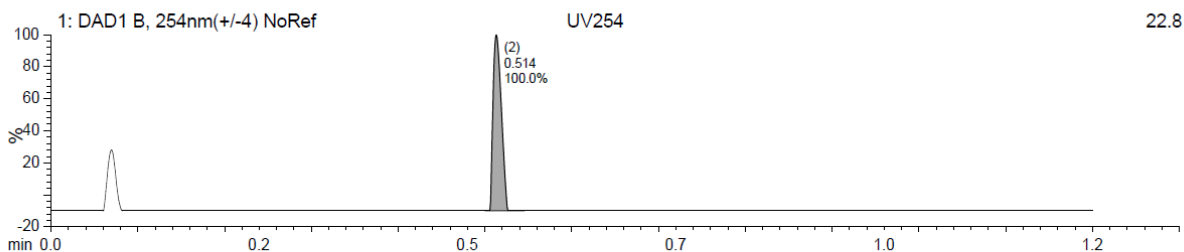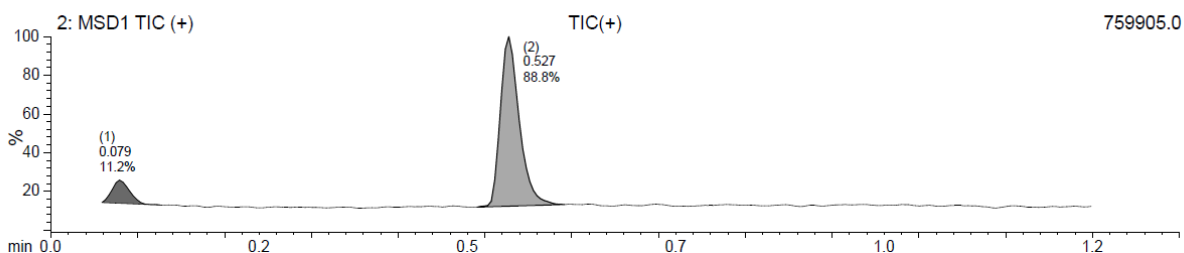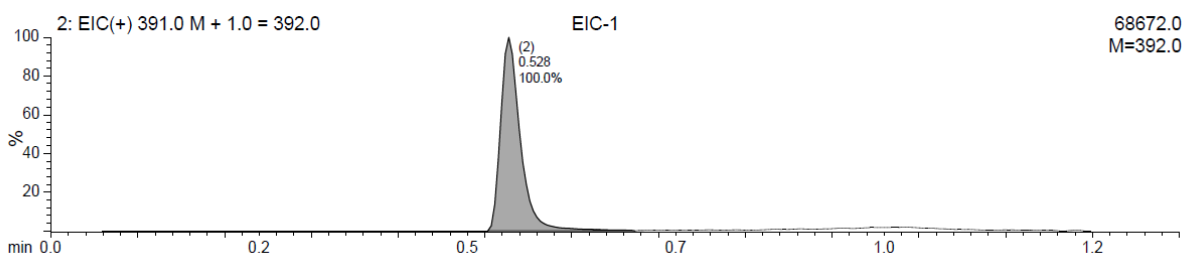

1-(2,3-Dichlorophenyl)piperazine (Sigma-Aldrich, 97%)

**SIGMA-ALDRICH**<sup>®</sup>

[sigma-aldrich.com](http://sigma-aldrich.com)

3050 Spruce Street, Saint Louis, MO 63103, USA

Website: [www.sigmaaldrich.com](http://www.sigmaaldrich.com)

Email USA: [techserv@sial.com](mailto:techserv@sial.com)

Outside USA: [eurtechserv@sial.com](mailto:eurtechserv@sial.com)

## Certificate of Analysis

Product Name:

1-(2,3-Dichlorophenyl)piperazine hydrochloride - 97%

Product Number: 679135  
Batch Number: MKCC1665  
Brand: ALDRICH  
CAS Number: 119532-26-2  
MDL Number: MFCD00190238  
Formula: C<sub>10</sub>H<sub>13</sub>Cl<sub>2</sub>N<sub>2</sub>  
Formula Weight: 267.58 g/mol  
Quality Release Date: 27 DEC 2016

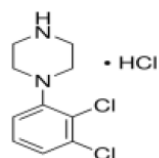

| Test                           | Specification         | Result   |
|--------------------------------|-----------------------|----------|
| Appearance (Color)             | White to Tan          | White    |
| Appearance (Form)              | Powder or Crystals    | Powder   |
| Infrared Spectrum              | Conforms to Structure | Conforms |
| Titration by AgNO <sub>3</sub> | 96.5 - 103.5 %        | 100.4 %  |
| Purity (HPLC)                  | ≥ 96.5 %              | 100.0 %  |

Michael Grady, Manager  
Quality Control  
Milwaukee, WI US

1-(3-Chlorophenyl)piperazine (Sigma-Aldrich, 99%)

**SIGMA-ALDRICH**<sup>®</sup>

[sigma-aldrich.com](http://sigma-aldrich.com)

3050 Spruce Street, Saint Louis, MO 63103, USA

Website: [www.sigmaaldrich.com](http://www.sigmaaldrich.com)

Email USA: [techserv@sial.com](mailto:techserv@sial.com)

Outside USA: [eurtechserv@sial.com](mailto:eurtechserv@sial.com)

## Certificate of Analysis

Product Name:

1-(3-Chlorophenyl)piperazine hydrochloride - 99%

**Product Number:** 125180  
**Batch Number:** MKBR2228V  
**Brand:** ALDRICH  
**CAS Number:** 65369-76-8  
**MDL Number:** MFCD00039032  
**Formula:** C<sub>10</sub>H<sub>13</sub>ClN<sub>2</sub> · xHCl  
**Formula Weight:** 196.68 g/mol  
**Quality Release Date:** 14 MAR 2014

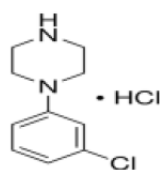

| Test                   | Specification         | Result    |
|------------------------|-----------------------|-----------|
| Appearance (Color)     | Off-White to Brown    | off-white |
| Appearance (Form)      | Powder                | Powder    |
| Infrared Spectrum      | Conforms to Structure | Conforms  |
| Carbon<br>(as 1 HCl)   | 50.8 - 52.8 %         | 51.2 %    |
| Nitrogen<br>(as 1 HCl) | 11.8 - 12.3 %         | 12.2 %    |

*Jamie Gleason*

Jamie Gleason, Manager  
Quality Control  
Milwaukee, Wisconsin US

D-<sup>13</sup>C<sub>6</sub>-glucose (Cambridge Isotope Laboratories, 99%)

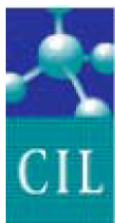

Cambridge Isotope Laboratories, Inc. Certificate of Analysis

**Product Name:** D-GLUCOSE  
(Isotopic Label & Enrichment Specification) (U-<sup>13</sup>C<sub>6</sub>, 99%)

**Lot Number:** PR-28579

**Catalog Number:** CLM-1396-0

**Product Information**

Chemical Purity Specification: ≥ 98%

MW\*: 186.11  
\* For isotopically labeled compounds, MW listed is for the fully enriched product.

Labeled CAS Number: 110187-42-3

Unlabeled CAS Number: 50-99-7

Chemical Formula: HO\*CH<sub>2</sub>(\*CHOH)<sub>4</sub>\*CHO

Storage: Store at room temperature away from light and moisture.

Stability: Stable if stored under recommended conditions.

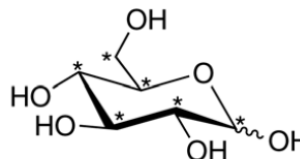

**Certification**

Cambridge Isotope Laboratories, Inc. guarantees that this material meets or exceeds the specifications stated. Absolute identity as well as chemical and isotopic purities are assured by the use of unambiguous synthetic routes and multiple chemical analyses whenever possible. Results are representative of QC testing at time of release from Quality Control unless otherwise stated. This COA references the bulk catalog number before packaging. The COA also applies to the CIL finished good catalog number which contains a different suffix such as -0.XX, -XXX, -10xX, -PK, etc. depending on the packaged size.

Approved by: Sashi Sivendran-Basak

Sashi Sivendran-Basak, Ph.D., Quality Review

**Quality Control Tests and Results**

|                                                  |          |
|--------------------------------------------------|----------|
| 13C NMR for Identification                       | Conforms |
| 1H NMR for Chemical Purity                       | Pass     |
| AgNO <sub>3</sub> Test for the Presence of Salts | Pass     |
| GC/MS for Methanol Content                       | 2933 ppm |
| HPLC for Chemical Purity                         | 99.0%    |
| Karl Fischer Titration for Total Water Content   | 876 ppm  |

(continued on next page)



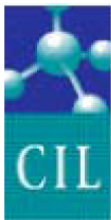

Cambridge Isotope Laboratories, Inc. Certificate of Analysis

**Product Name:** D-GLUCOSE  
(Isotopic Label & Enrichment Specification) (U-13C6, 99%)  
**Lot Number:** PR-28579  
**Catalog Number:** CLM-1396-0

**Quality Control Tests and Results (continued)**

---

|                                           |           |
|-------------------------------------------|-----------|
| Melting Point Range Determination         | 140-150°C |
| Mass Spectrometry for Isotopic Enrichment | 99.0%     |

Product Notes:  
Enrichment analyses vary from 98%-100%, based on precision of measurement.
